# Supplementary material for: A self-assembled urchin-like TiO2@Ag–CuO with enhanced photocatalytic activity toward tetracycline hydrochloride degradation
Source: Royal Society of Chemistry journal article supplement (doi:10.1039/d0nj02153a), 2020-01-01
Supplement: d0nj02153a1.pdf [file d0nj02153a1.pdf]

## Electronic Supplementary Information

### A Self-assembled Urchin-like $\text{TiO}_2@\text{Ag-CuO}$ with Enhanced Photocatalytic Activity toward Tetracycline Hydrochloride Degradation

Yin'an Zhu, Ye Pan\*, Enming Zhang and Weiji Dai

*School of Materials Science and Engineering, Southeast University, Jiangsu Key Laboratory for Advanced Metallic Materials, Nanjing 211189, China*

\*Corresponding author. *e-mail address:* [panye@seu.edu.cn](mailto:panye@seu.edu.cn) (Y. Pan).

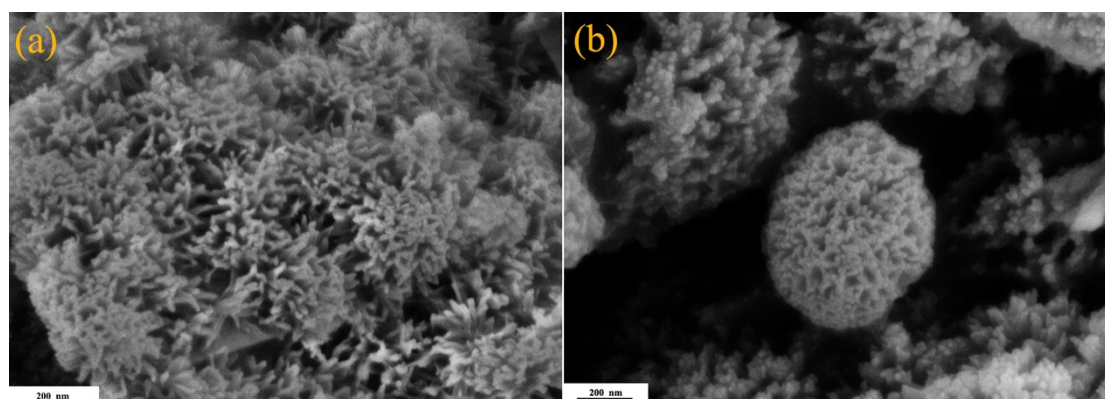

**Fig.S1** SEM images of the corrosion product (a)  $\text{Cu}_{60}\text{Ti}_{40}$  ribbons and (b)  $\text{Cu}_{60}\text{Ti}_{30}\text{M}_{10}$  ribbons

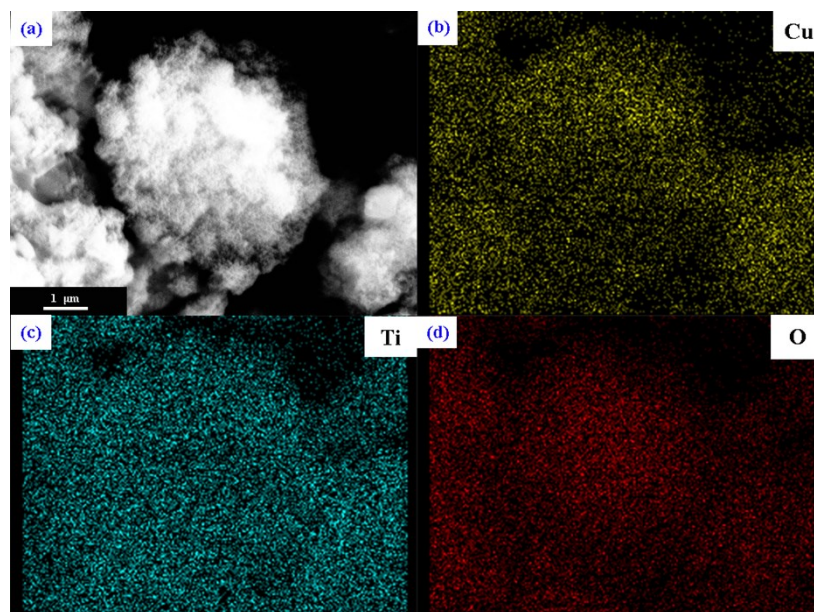

**Fig.S2** EDS mapping of  $\text{TiO}_2@\text{CuO}$ , (a) SEM images, (b) Cu, (c) Ti, (d) O

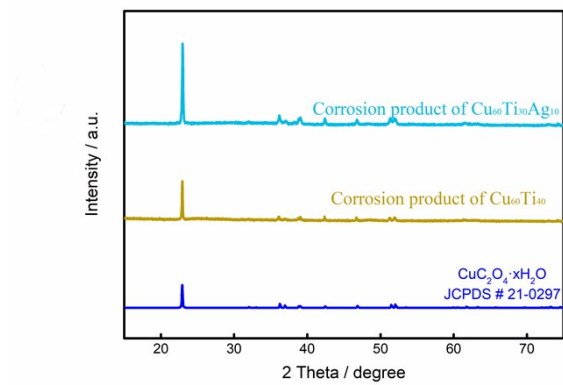

**Fig. S3** XRD patterns of the corrosion products of Cu<sub>60</sub>Ti<sub>30</sub>M<sub>10</sub> (M=Ti, Ag) ribbons

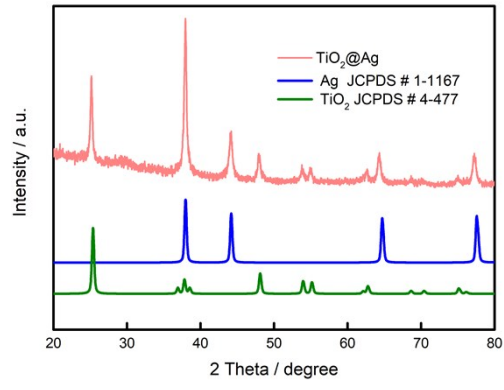

Fig.S4 XRD patterns of  $\text{TiO}_2@Ag$  heterojunction

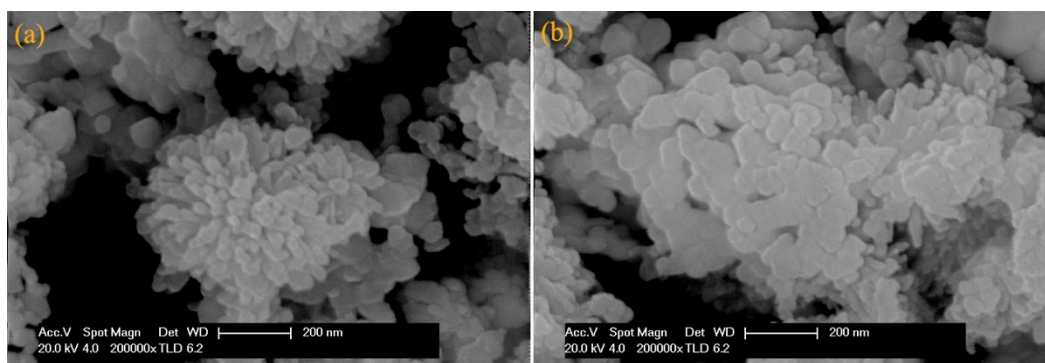

Fig. S5 SEM images of the  $\text{TiO}_2@\text{Ag-CuO}$  after four cycles

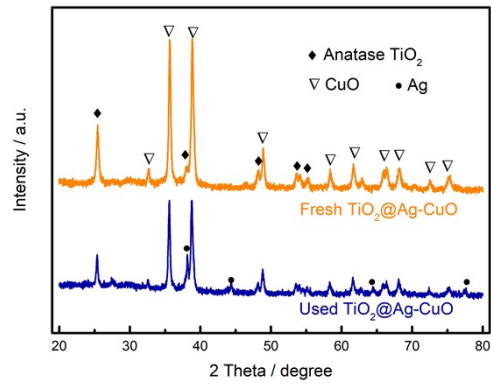

Fig.S6 XRD patterns of fresh and used TiO<sub>2</sub>@Ag heterojunction

Table S1. The collected data for different photocatalysts toward Tetracycline Hydrochloride degradation

| Photocatalyst                                                     | Dosage<br>(g/L) | TC concentration<br>(mg/L) | Light Source                | Degradation<br>time(min) | Degradation<br>rate | Ref.                 |
|-------------------------------------------------------------------|-----------------|----------------------------|-----------------------------|--------------------------|---------------------|----------------------|
| WO <sub>3</sub> /BiVO <sub>4</sub> /W-Pt                          | -               | 20                         | 350W, Xe lamp               | 240                      | 78%                 | 1                    |
| 2D/3D g-C <sub>3</sub> N <sub>4</sub>                             | 0.5             | 10                         | 250W, Xe lamp, λ>400 nm     | 120                      | 69.6%               | 2                    |
| CQDs/Bi <sub>5</sub> O <sub>7</sub> I                             | 0.5             | 20                         | 300W, Xe lamp, λ>400 nm     | 120                      | 53%                 | 3                    |
| Pt/rutile-amorphous TiO <sub>2</sub>                              | 0.5             | 50                         | 500W, Xe lamp               | 300                      | ~100%               | 4                    |
| ZnO@NH <sub>2</sub> -UiO-66                                       | 0.25            | 20                         | Xe lamp                     | 120                      | ~65%                | 5                    |
| C/BiOCl                                                           | 0.5             | 10                         | 300W Xe lamp, full spectrum | 90                       | 71.8%               | 6                    |
| γ-Fe <sub>2</sub> O <sub>3</sub> /g-C <sub>3</sub> N <sub>4</sub> | 0.5             | 10                         | 500W, Xe lamp, λ>420 nm     | 120                      | 73.8%               | 7                    |
| In <sub>2</sub> S <sub>3</sub> /NaTaO <sub>3</sub>                | 0.5             | 10                         | 300W, Xe lamp               | 180                      | ~75%                | 8                    |
| Ag QDs/BiOBr                                                      | 0.5             | 20                         | Xenon lamp                  | 120                      | 77.2%               | 9                    |
| <b>TiO<sub>2</sub>@Ag-CuO</b>                                     | <b>1</b>        | <b>30</b>                  | 500W, Xe lamp, λ>420 nm     | <b>180</b>               | <b>82.86%</b>       | <b>This<br/>work</b> |

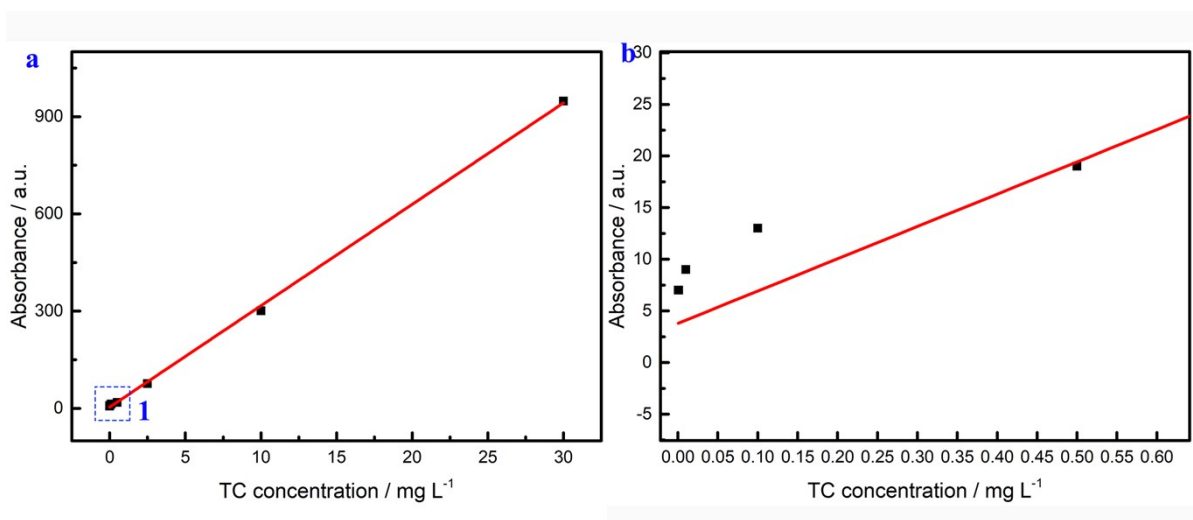

Fig.S7 (a) The absorbance intensity at a series of tetracycline hydrochloride concentration; (b) enlarged section of 1

## References

- 1 L. Xia, J. Bai, J. Li, Q. Zeng, X. Li and B. Zhou, *Appl. Catal. B Environ.*, 2016, **183**, 224–230.
- 2 H. Dong, X. Zhang, J. Li, P. Zhou, S. Yu, N. Song, C. Liu, G. Che and C. Li, *Appl. Catal. B Environ.*, 2020, **263**, 118270.
- 3 R. Chen, Z. Chen, M. Ji, H. Chen, Y. Liu, J. Xia and H. Li, *J. Colloid Interface Sci.*, 2018, **532**, 727–737.
- 4 J. Lyu, Z. Zhou, Y. Wang, J. Li, Q. Li, Y. Zhang, X. Ma, J. Guan and X. Wei, *J. Hazard. Mater.*, 2019, **373**, 278–284.
- 5 Q. Du, P. Wu, Y. Sun, J. Zhang and H. He, *Chem. Eng. J.*, , DOI:10.1016/j.cej.2020.124614.
- 6 Y. Yan, C. Ma, H. Huang, K. Yu, Y. Liu, C. Li, Z. Zhu, P. Huo, X. Tang, Y. Liu and Z. Lu, *New J. Chem.*, 2020, **44**, 79–86.
- 7 C. Li, S. Yu, H. Che, X. Zhang, J. Han, Y. Mao, Y. Wang, C. Liu and H. Dong, *ACS Sustain. Chem. Eng.*, 2018, **6**, 16437–16447.
- 8 J. Xu, B. Luo, W. Gu, Y. Jian, F. Wu, Y. Tang and H. Shen, *New J. Chem.*, 2018, **42**, 5052–5058.
- 9 J. Di, J. Xia, M. Ji, B. Wang, S. Yin, Y. Huang, Z. Chen and H. Li, *Appl. Catal. B Environ.*, 2016, **188**, 376–387.
